# Supplementary material
Source: PubMed Central journal article supplement (PMC6372193)
Supplement: mmc1.pdf [file mmc1.pdf]

**Biophysical Journal, Volume 115**

**Supplemental Information**

**Peptide-Lipid Interaction Sites Affect Vesicles' Responses to Antimicrobial Peptides**

**Yu Shi, Mingwei Wan, Lei Fu, Shan Zhang, Shiyuan Wang, Lianghui Gao, and Weihai Fang**

# Supplementary Material for

## Peptide–Lipid Interaction Sites Affect Vesicles’ Responses to Antimicrobial Peptides

Yu Shi, Mingwei Wan, Lei Fu, Shan Zhang, Shiyuan Wang, Lianghui Gao\*, and Weihai Fang

Corresponding Author: Lianghui Gao

Email: [lhgao@bnu.edu.cn](mailto:lhgao@bnu.edu.cn)

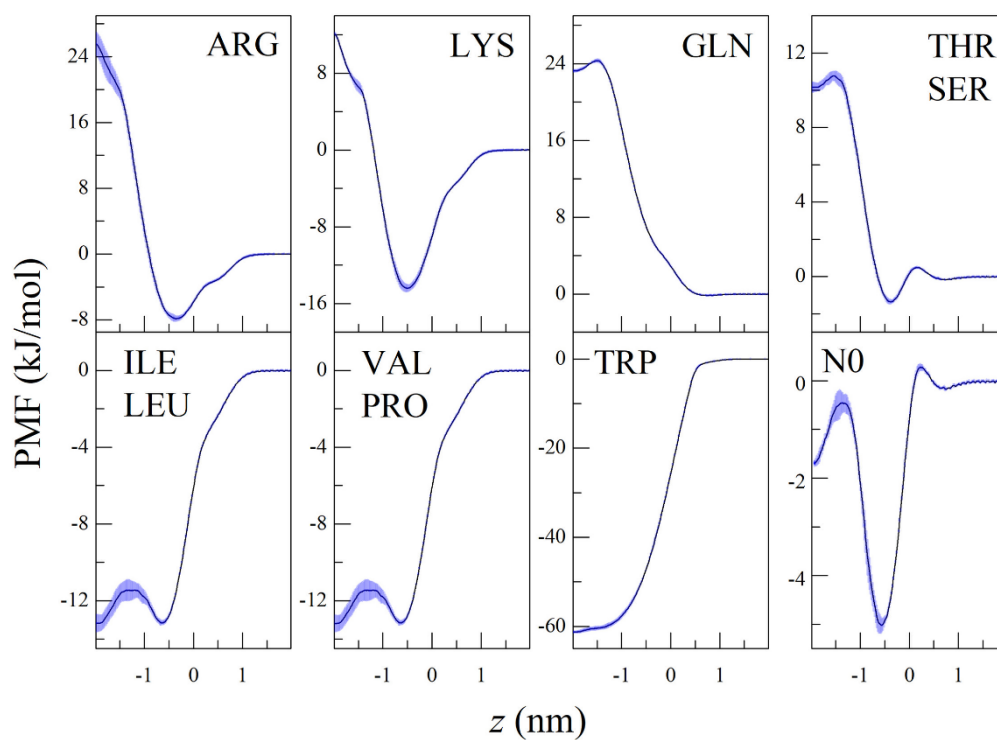

**Figure S1.** PMF for moving typical amino acid side-chain analogues and backbone bead (N0) across a DOPC bilayer as a function of the distance  $z$  from the phosphate group in bilayer normal direction calculated by using Dry MARTINI force field.

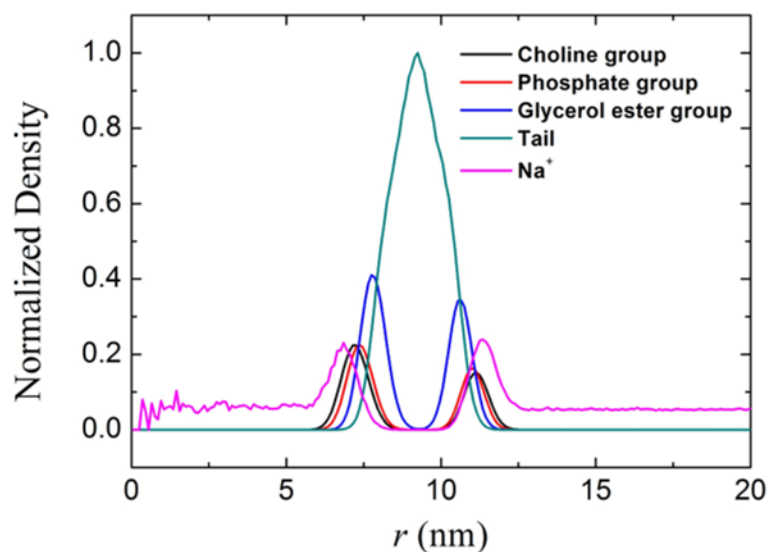

**Figure S2.** Normalized density distribution profiles of lipid beads and counter ions as a function of distance relative to the vesicle center for a vesicle containing 3200 DOPC/DOPG lipids. The density of the counter ions is magnified 100 times for a clear view.

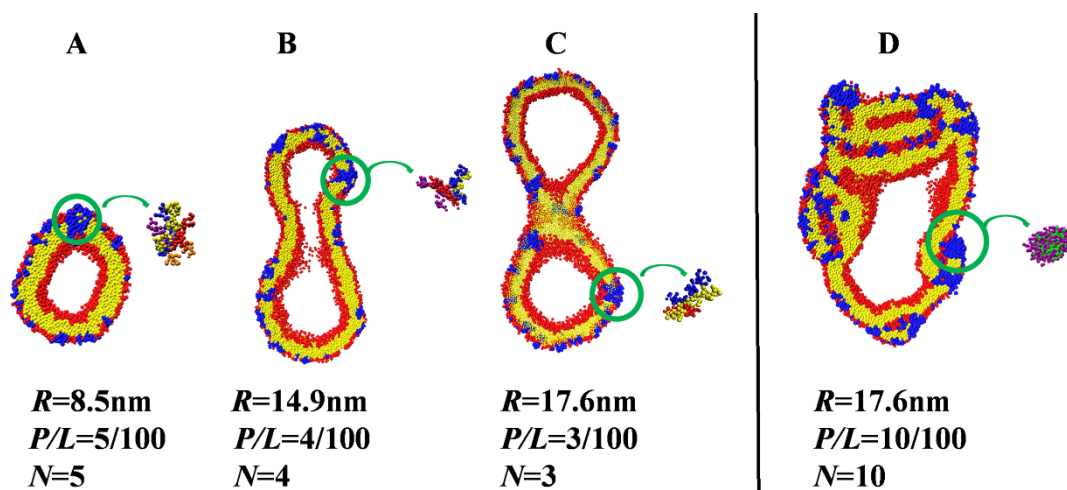

**Figure S3.** (A)-(C) Melittin-induced membrane pores on different-sized vesicles. The peptides in a largest pore (circled region) are amplified and presented in different colors. (D) Melittin oligomer bound on the exterior surface of a large vesicle. The hydrophilic and charged side-chain beads of the peptides are in purple color, while the hydrophobic side-chain beads and backbone beads are in green color.

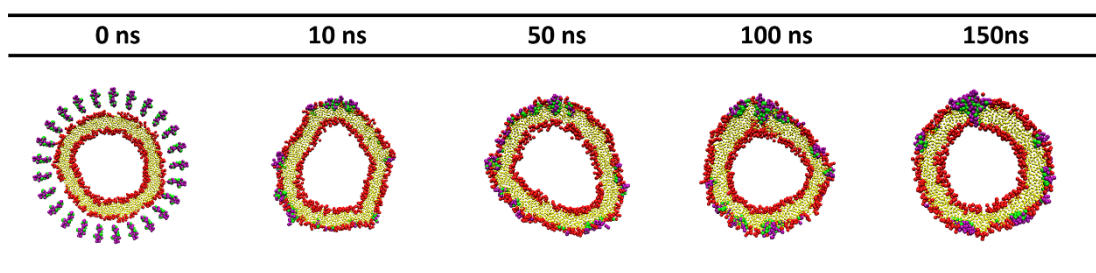

**Figure S4.** Snapshots of melittin binding, penetration, and insertion in the early stage of peptide-vesicle assembling process (corresponding to Figure 5A). For clear views of these states, the hydrophilic and charged side-chain beads of the peptides are in purple color, the hydrophobic side-chain beads and backbone beads are in green color, the tail beads of the lipids are transparent.

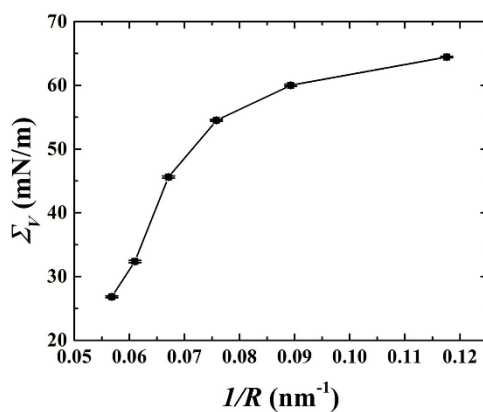

**Figure S5.** Membrane tension as a function of vesicle's curvature. Each datum was obtained from 500 samples evenly chosen from a trajectory in the last 500 ns.

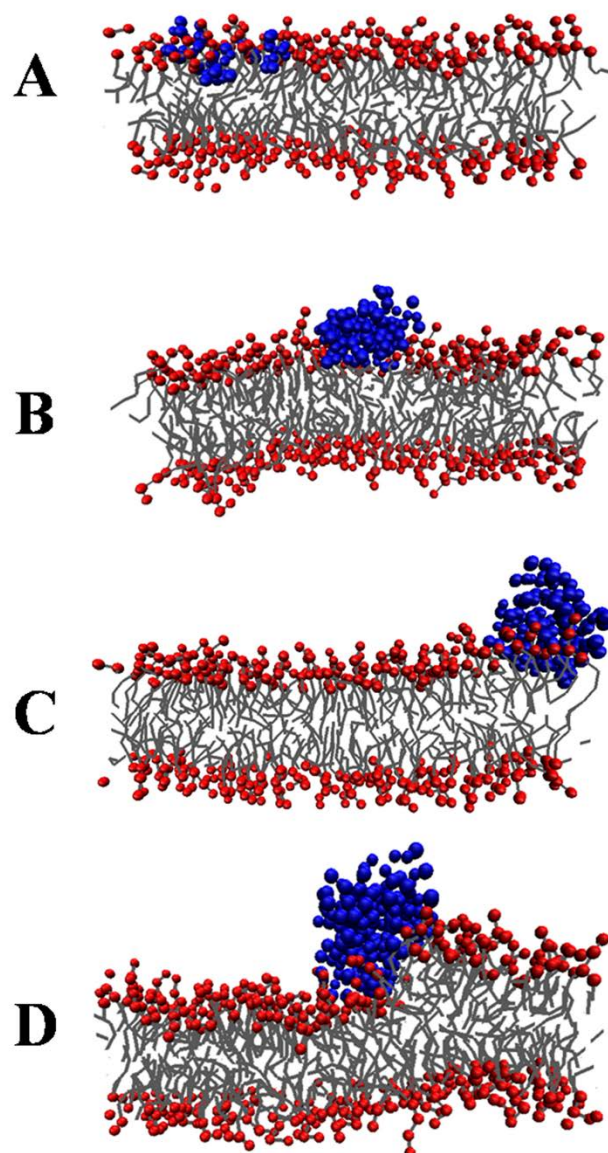

**Figure S6.** Snapshots of a melittin (A) monomer, (B) dimer, (C) trimer, and (D) tetramer bound on an initially tensionless planar lipid bilayer. For a clear view of the orientation of the lipid tails, bonds present them.

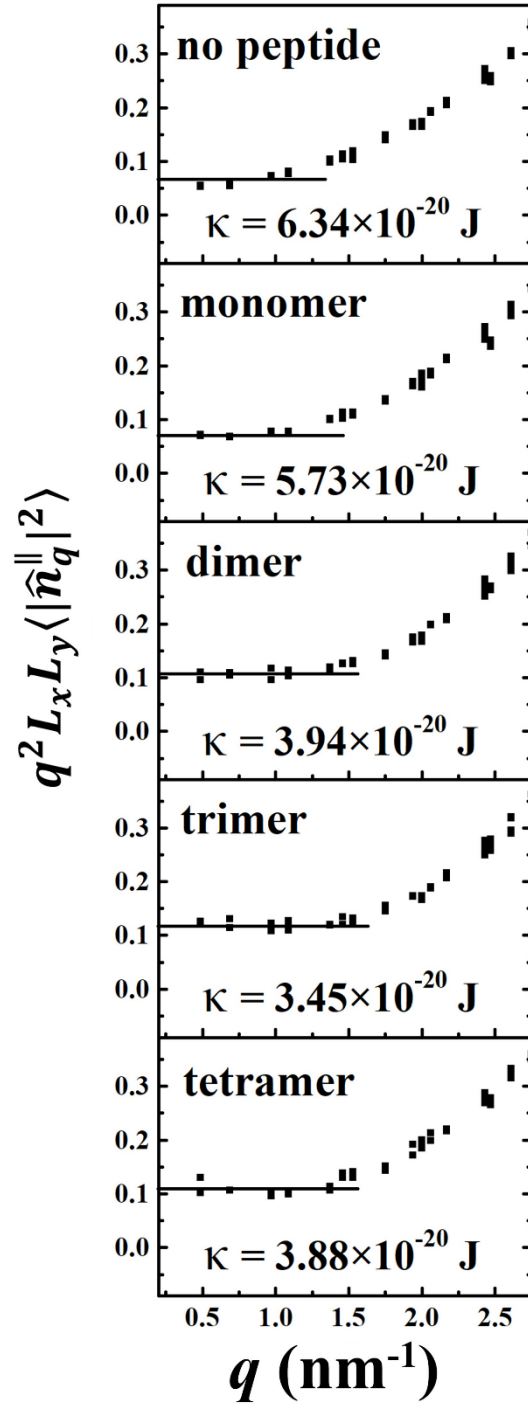

**Figure S7.** Spectrum of longitudinal lipid orientation fluctuations of an initially tensionless planar lipid bilayer before binding of peptide and after binding of a melittin monomer, dimer, trimer, and tetramer.

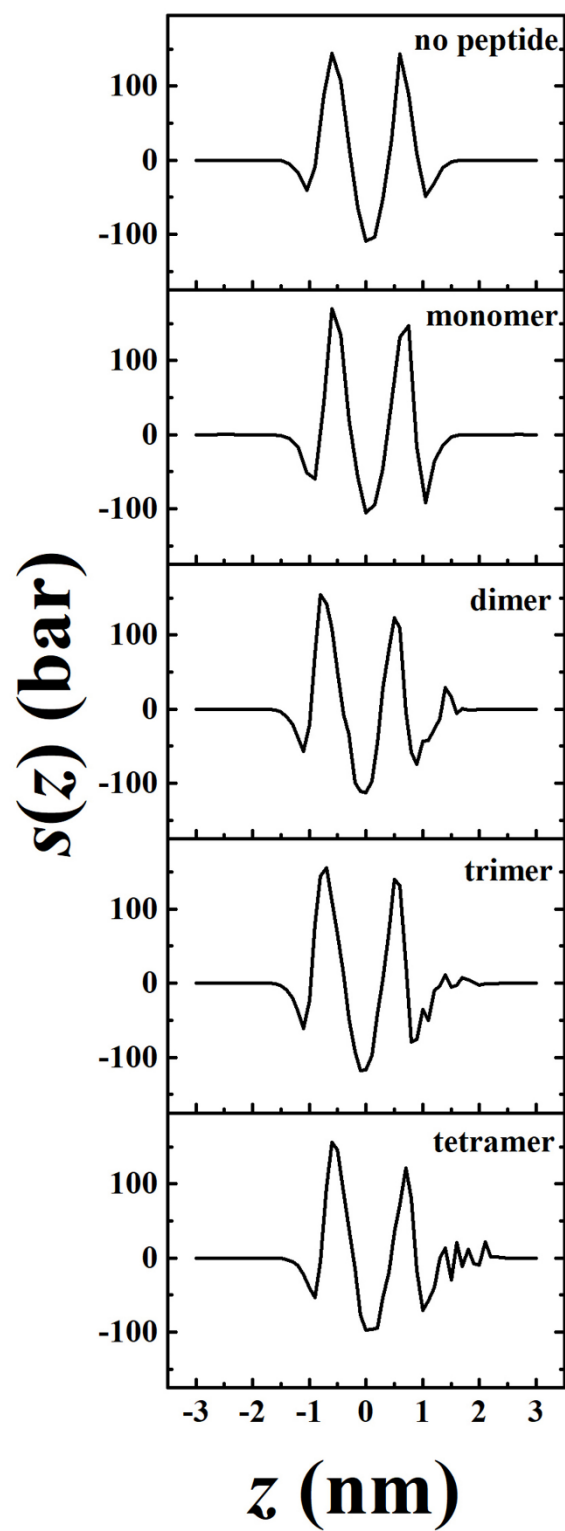

**Figure S8.** Stress profile of an initially tensionless planar lipid bilayer before binding of peptide and after binding of a melittin monomer, dimer, trimer, and tetramer.
